# Supplementary material for: Characterization of the Antibody and Interferon-Gamma Release Response after a Second COVID-19 Booster Vaccination
Source: MDPI journal article supplement (doi:10.3390/vaccines10071163), 2022-07-21
Supplement: s1 [file s1]

## Supplement:

### Characterization of antibody and T-cell response after second COVID-19 booster vaccination

#### Supplement Methods:

#### Anti-Spike-IgG assay

Serum anti-Spike receptor-binding-domain (RBD) IgG antibody concentration was determined using the SARS-CoV-2 IgG-II Quant assay and the Alinity I device (Abott Diagnostics, Germany) with an analytical measurement range from 2.98–5680 binding antibody units per mL (BAU/mL).

#### Supplement Figures:

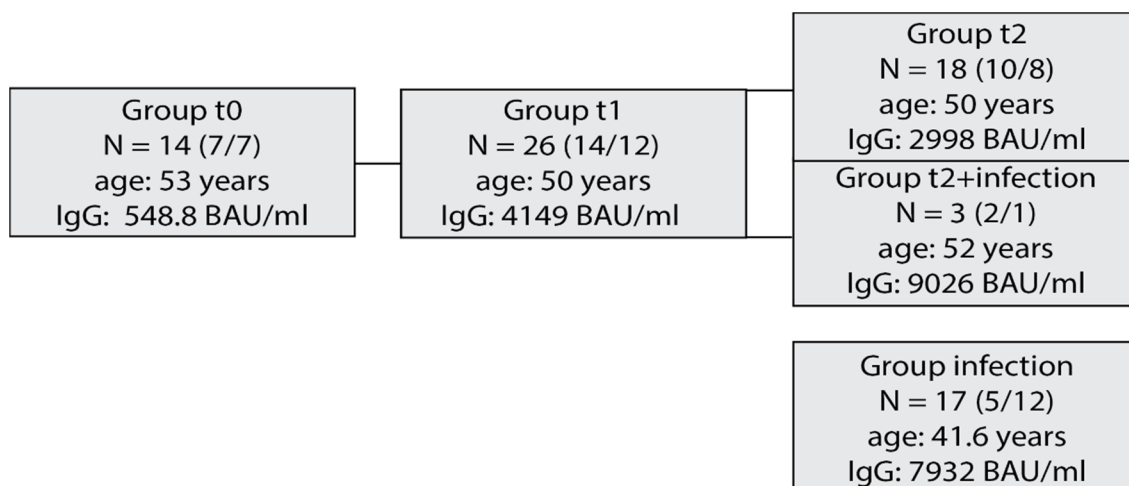

**Supplement Figure S1: Graphical summary of groups used in the study.** N=female vs male; age and IgG = mean. For more details refer to Table S1 and S2.

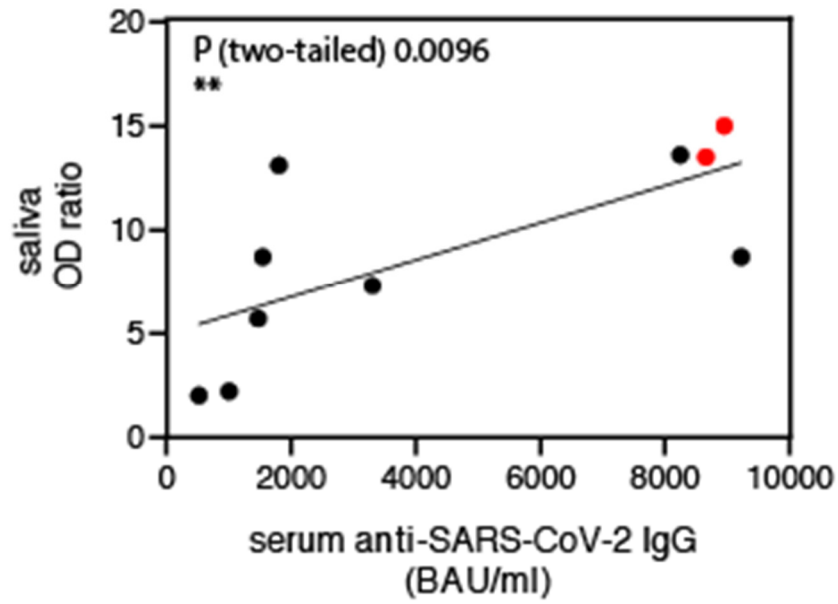

**Supplement Figure S2:** Correlation between anti-SARS-CoV-2 Spike IgGs measured in serum using SARS-CoV-2 IgG II Quant assay (Abott) and Anti-SARS-CoV-2 ELISA in saliva (Euroimmun). N=10, red dots = infected individuals after 2<sup>nd</sup> booster vaccination (Table S1), Correlation – two-tailed, non-parametric. Asteriks (\*\*) indicate  $p < 0.01$

**Supplement Table S1: Characteristics of the study population after a second booster vaccination**

| No | age | sex | regime    | 1 <sup>st</sup><br>boost<br>er<br>(b1) | 2 <sup>nd</sup><br>booster<br>(b2) | Diff.<br>b1/b2<br>(months) | t1<br>weeks<br>since b2 | t2<br>weeks since<br>b2 | t3<br>weeks<br>infection/b2 | IgG<br>t1<br>(BAU/ml) | IgG<br>t2<br>(BAU/ml) | IgG<br>t3<br>(BAU/ml) | IGRA<br>(mIU/ml) |
|----|-----|-----|-----------|----------------------------------------|------------------------------------|----------------------------|-------------------------|-------------------------|-----------------------------|-----------------------|-----------------------|-----------------------|------------------|
| 1  | 45  | m   | BNT/BNT   | BNT                                    | 1273                               | 4                          | 2                       | 8.6                     |                             | 1018.2                | 13640                 | 8242.2                | 1542             |
| 2  | 43  | f   | BNT/BNT   | BNT                                    | 1273                               | 4                          | 2                       | 8.6                     |                             | 638.8                 | 2761.4                | 1468                  | 3485             |
| 3  | 79  | m   | ChAd/ChAd | BNT                                    | 1273                               | 3.6                        | 2                       |                         |                             | 125.4                 | 691.4                 |                       |                  |
| 4  | 72  | f   | ChAd/ChAd | BNT                                    | 1273                               | 3.6                        | 2                       |                         |                             | 262.1                 | 3541.8                |                       |                  |
| 5  | 44  | m   | BNT/BNT   | BNT                                    | 1273                               | 3                          | 2                       | 8.6                     | 6                           | 1155.7                | 4799.1                | 9477.8                |                  |
| 6  | 63  | f   | ChAd/ChAd | BNT                                    | 1273                               | 3.6                        | 2                       | 8.6                     | 4                           | 485.2                 | 2708.8                | 8948.4                | >10.000          |
| 7  | 41  | m   | J&J       | BNT                                    | 1273                               | 3.6                        | 2                       | 8.6                     |                             | 199.7                 | 1851.4                | 1044.7                | 1463             |
| 8  | 64  | m   | BNT/BNT   | BNT                                    | 1273                               | 5.4                        | 2                       | 8.7                     |                             | 124.7                 | 942.3                 | 521.7                 | 169              |
| 9  | 46  | f   | BNT/BNT   | BNT                                    | 1273                               | 4.3                        | 2                       | 6.0                     |                             | 630.3                 | 2955.4                | 1802.4                | 7206             |
| 10 | 44  | f   | BNT/BNT   | BNT                                    | 1273                               | 4.8                        | 2.6                     | 6.6                     |                             | 407.1                 | 18910                 | 9219.7                |                  |
| 11 | 54  | m   | BNT/BNT   | BNT                                    | BNT                                | 5                          | 2                       | 6.0                     |                             | 535                   | 2597.9                | 1542.7                | 1113             |
| 12 | 65  | m   | BNT/BNT   | BNT                                    | 1273                               | 3.6                        | 5                       | 8.9                     |                             | 796.2                 | 2437.9                | 2114.2                | 1690             |
| 13 | 43  | f   | BNT/BNT   | BNT                                    | BNT                                | 4.3                        | 2                       |                         |                             | 611.5                 | 3473.8                |                       |                  |
| 14 | 48  | f   | BNT/BNT   | BNT                                    | 1273                               | 3.6                        | 1.6                     |                         |                             | 692.8                 | 2523.4                |                       |                  |
| 15 | 51  | m   | BNT/BNT   | BNT                                    | 1273                               | 3.6                        | 4                       |                         |                             |                       | 3049.2                |                       |                  |
| 16 | 44  | f   | BNT/BNT   | BNT                                    | 1273                               | 3.6                        | 2                       | 6.0                     |                             |                       | 4333.4                | 3478.1                | 4911             |
| 17 | 57  | f   | BNT/BNT   | BNT                                    | 1273                               | 4.3                        | 2                       | 6.0                     |                             |                       | 6814.1                | 7536.5                | 8863             |
| 18 | 34  | m   | BNT/BNT   | BNT                                    | 1273                               | 4.3                        | 2.7.                    |                         |                             |                       | 5188.1                |                       |                  |
| 19 | 28  | f   | BNT/BNT   | BNT                                    | BNT                                | 4.1                        | 1.6                     | 5.6                     |                             |                       | 1560.8                | 1009.2                | 3113             |
| 20 | 46  | f   | BNT/BNT   | BNT                                    | BNT                                | 4.3                        | 5                       | 8.9                     |                             |                       | 3579.5                | 3302                  |                  |
| 21 | 41  | m   | BNT/BNT   | BNT                                    | BNT                                | 3.6                        | 1.9                     | 5.9                     |                             |                       | 1321.7                | 1057.5                | 4300             |
| 22 | 31  | f   | BNT/BNT   | BNT                                    | BNT                                | 4.3                        | 2.6                     |                         |                             |                       | 1004.3                |                       | 2873             |

|                 |                 |   |         |     |     |                |                |                  |                  |                     |                       |                    |                      |
|-----------------|-----------------|---|---------|-----|-----|----------------|----------------|------------------|------------------|---------------------|-----------------------|--------------------|----------------------|
| 23              | 70              | f | BNT/BNT | BNT | BNT | 4.1            | 5              | 8.9              |                  |                     | 718.7                 | 532.7              | 1213                 |
| 24              | 57              | m | BNT/BNT | BNT | BNT | 3.6            | 2              | 6                |                  |                     | 3527.4                | 2100               | 7717                 |
| 25              | 32              | f | BNT/BNT | BNT | BNT | 4.3            | 2.3            |                  |                  |                     | 10620.7               |                    |                      |
| 26              | 49              | f | BNT/BNT | BNT | BNT | 4.4            | 1.6            | 5.6              | 1.1              |                     | 2330.8                | 8652.8             | 2960                 |
| Mean<br>(range) | 49.6<br>(28-79) |   |         |     |     | 4<br>(3.0-5.4) | 2.5<br>(1.6-5) | 7.3<br>(5.6-8.9) | 3.7<br>(1.1-6.0) | 548.8<br>(124-1156) | 4149<br>(691.4-18910) | 4003<br>(512-9478) | 3914<br>(169-10.000) |

**Supplement Table S2: Characteristics of the study population after a booster vaccination followed by Omicron BA.1 infection**

| No              | age             | sex | regime    | 1 <sup>st</sup><br>booster<br>(b1) | vacc/b1<br>(months) | b1/infection<br>(weeks) | analysis after<br>infection<br>(weeks) | IgG<br>t2<br>(BAU/ml) |
|-----------------|-----------------|-----|-----------|------------------------------------|---------------------|-------------------------|----------------------------------------|-----------------------|
| 27              | 59              | m   | 1273/1273 | 1273                               | 5.6                 | 0.7                     | 4.7                                    | 14000                 |
| 28              | 31              | f   | BNT/BNT   | BNT                                | 8.0                 | 9.1                     | 7.9                                    | 10.537.8              |
| 29              | 31              | m   | BNT/BNT   | BNT                                | 7.6                 | 9.4                     | 7.6                                    | 4292.6                |
| 30              | 45              | m   | BNT/BNT   | BNT                                | 8.4                 | 1.4                     | 6.1                                    | 5257                  |
| 31              | 54              | m   | BNT/BNT   | BNT                                | 7.0                 | 1.4                     | 6.7                                    | 31840                 |
| 32              | 28              | f   | BNT/BNT   | BNT                                | 6.2                 | 0.4                     | 6.6                                    | 7461.8                |
| 33              | 63              | m   | BNT/BNT   | BNT                                | 5.9                 | 1.7                     | 8.4                                    | 4923.4                |
| 34              | 27              | m   | 1273/1273 | BNT                                | 9.2                 | 3.0                     | 5.9                                    | 1544.9                |
| 35              | 32              | m   | 1273/1273 | BNT                                | 5.0                 | 1.7                     | 6.1                                    | 7535.7                |
| 36              | 22              | m   | BNT/BNT   | BNT                                | 5.2                 | 4.7                     | 5.4                                    | 2637.4                |
| 37              | 50              | f   | BNT/BNT   | BNT                                | 5.5                 | 5.0                     | 4                                      | 3612.1                |
| 38              | 50              | m   | 1273/1273 | BNT                                | 8.4                 | 6.9                     | 4                                      | 16240.0               |
| 39              | 52              | m   | BNT/BNT   | BNT                                | 2.0                 | 3.0                     | 3.9                                    | 3285.6                |
| 40              | 51              | m   | BNT/BNT   | BNT                                | 5.5                 | 6.3                     | 4.4                                    | 1998.5                |
| 41              | 30              | m   | BNT/BNT   | BNT                                | 5.4                 | 2.9                     | 6.7                                    | 9324.3                |
| 42              | 31              | f   | BNT/BNT   | 1273                               | 7.3                 | -4.9                    | 7.3                                    | 8667                  |
| 43              | 51              | f   | BNT/BNT   | BNT                                | 5.6                 | 1.4                     | 9.2                                    | 1687.21               |
| Mean<br>(range) | 41.6<br>(22-63) |     |           |                                    | 6.3<br>(2-7.2)      | 3.2<br>(-4.9-9.4)       | 6.2<br>(3.9-9.2)                       | 7932<br>(1545-31840)  |

Abbreviations: BNT = BNT162b2, Pfizer-BioNtech vaccine; 1273 = mRNA-1273, Moderna vaccine, JJ = Johnson&Johnson vaccine, ChAD = ChAdOx-1S = AstraZeneca vaccine
